# Supplementary material for: Soy Isoflavones Protect Neuronal PC12 Cells against Hypoxic Damage through Nrf2 Activation and Suppression of p38 MAPK and AKT–mTOR Pathways
Source: MDPI journal article supplement (doi:10.3390/antiox11102037), 2022-10-16
Supplement: s1 [file s1]

## Supplementary Figure legends

**Figure S1** The protective potency of six isoflavone monomers on PC12 cell viability under hypoxic injury

**Figure S2** Cytotoxicity of isoflavone monomers for U<sub>2</sub>OS cells. (A) Daidzin and daidzein. (B) Genisitin and genistein. (D) Glycitin and glycitein.

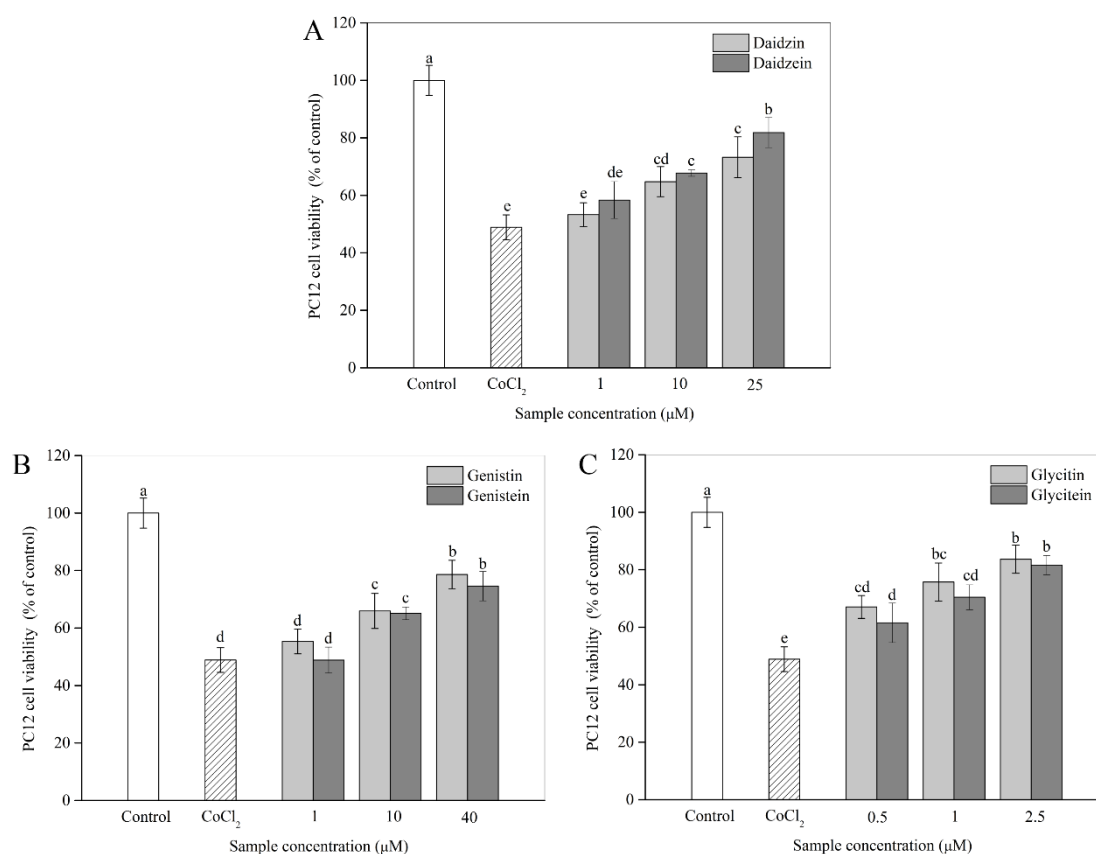

**Figure S1**

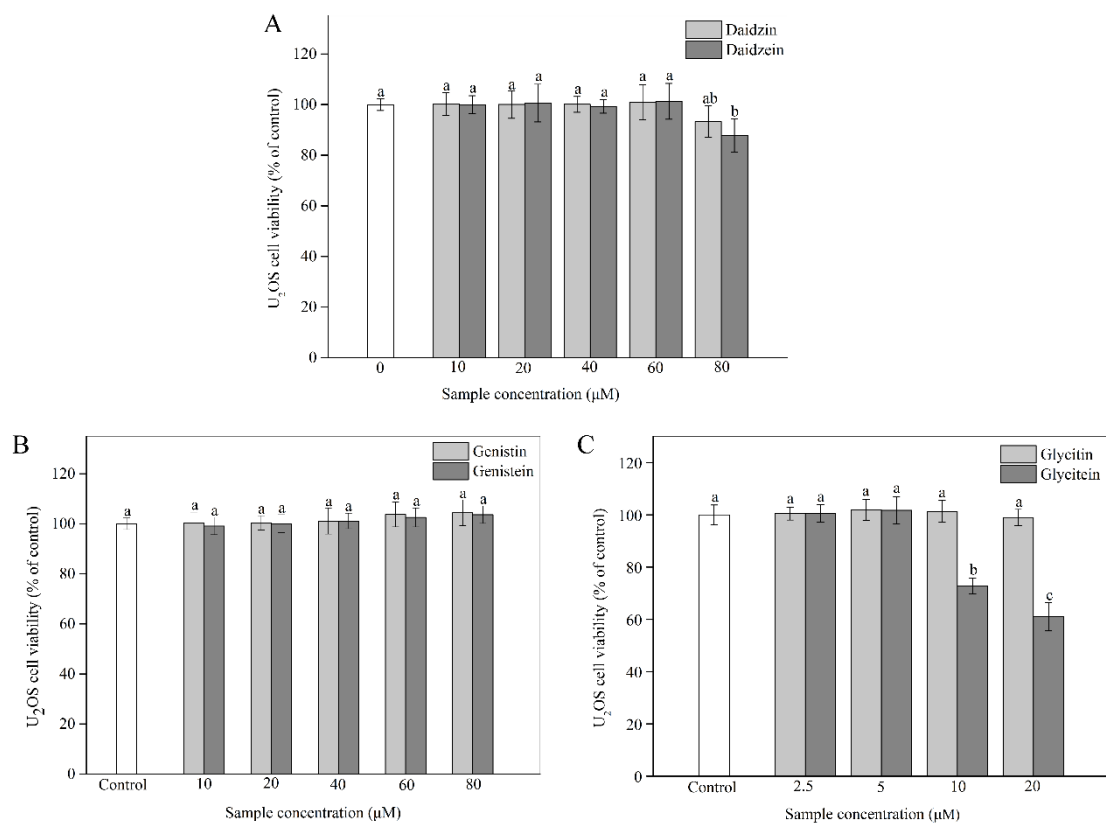

**Figure S2**
